# Supplementary material for: Novel PEX11B Mutations Extend the Peroxisome Biogenesis Disorder 14B Phenotypic Spectrum and Underscore Congenital Cataract as an Early Feature
Source: PubMed Central journal article supplement — Invest Ophthalmol Vis Sci. Author manuscript; Available in PMC 2018 Mar 7. (PMC5841568; doi:10.1167/iovs.16-21026), 2017-01-01

**Supplementary Data: Novel *PEX11B* mutations extend the peroxisome biogenesis disorder 14B phenotypic spectrum and underscore congenital cataract as an early feature**

**Supplementary Data A: Oligonucleotides used for *PEX11B* analysis**

*PEX11B* sequencing primers:-

Exon 1 L: GTAGCGCGACGGCCAGTCTTCAGTGCTCAGAGCCAAG

Exon 1 R: CAGGGCGCAGCGATGACATGCTCCTCATTCCATCACC

Exon 2 L: GTAGCGCGACGGCCAGTTCTGTCTGTGCCTTTTGGAAG

Exon 2 R: CAGGGCGCAGCGATGACGGAAGGAGGGACAAAGGAAG

Exon 3 L: GTAGCGCGACGGCCAGTCTCAACTTTTGCCCTCTTGC

Exon 3 R: CAGGGCGCAGCGATGACAAGTGATTGGAAGCCAAGTG

Exon 4 L: GTAGCGCGACGGCCAGTTGGAGGACATTTCTAATAGGGG

Exon 4 R: CAGGGCGCAGCGATGACATTCTGAATGAGGCTGGCAC

- Underlined bases are N13 tags to facilitate sequencing

*PEX11B* ddPCR primers:-

Exon 1 L: TGA~~CTAGGGGCGGGAAGT~~

Exon 1 R: GGCTTGGCTCTGAGCACT

Used together with UPL probe #26

Exon 2 L: TTTTATCCCCAACCTTCC

Exon 2 R: GTGCAGAGCCAAATGAGAAA

Used together with UPL probe #12

Exon 3 L: CCTGTGACAATGTCCTGTGG

Exon 3 R: GGGCCCACTTCTCCTGAT

Used together with UPL probe #36

Exon 4 L: ACTCCAGGAGGAGGTCTGC

Exon 4 R: AGCCAGGAGCAGGACTTG

Used together with UPL probe #21

PEX11B dosage PCR primers:-

PEX11B\_Ex01dosF: agctaagcgcgagaaggcCCGCTTCAGTGCTCAGAG

PEX11B\_Ex01dosR: gctttaccgctcaaccgttGAAAGGAATCATCTCAACAGC

PEX11B\_Ex03dosF: agctaagcgcgagaaggcTCACTGTTAGTCACCTCAATC

PEX11B\_Ex03dosR: gctttaccgctcaaccgttCACTTCTCTGATCCACAC

PEX11B\_Ex04-1dosF: agctaagcgcgagaaggcCTACTGATGGAGCAAGAGTC

PEX11B\_Ex04-1dosR: gctttaccgctcaaccgttGAAGAGATCACAGGCATTCT

PEX11B\_Ex-04-2dosF: agctaagcgcgagaaggcCTCCATCCTGTCTATTCTCAC

PEX11B\_Ex04-2dosR: gctttaccgctcaaccgttGAGTAGAATTGAATGAGGCT

UniDos\_F\_FAM: agctaagcgcgagaaggc

UniDos\_R: gctttaccgctcaaccgtt

- Underlined bases are tags to facilitate universal fluorescently labelled primer pair hybridisation

Supplementary Figure S1: ExomeDepth dosage analysis of PEX11B in exome data from patient I.1

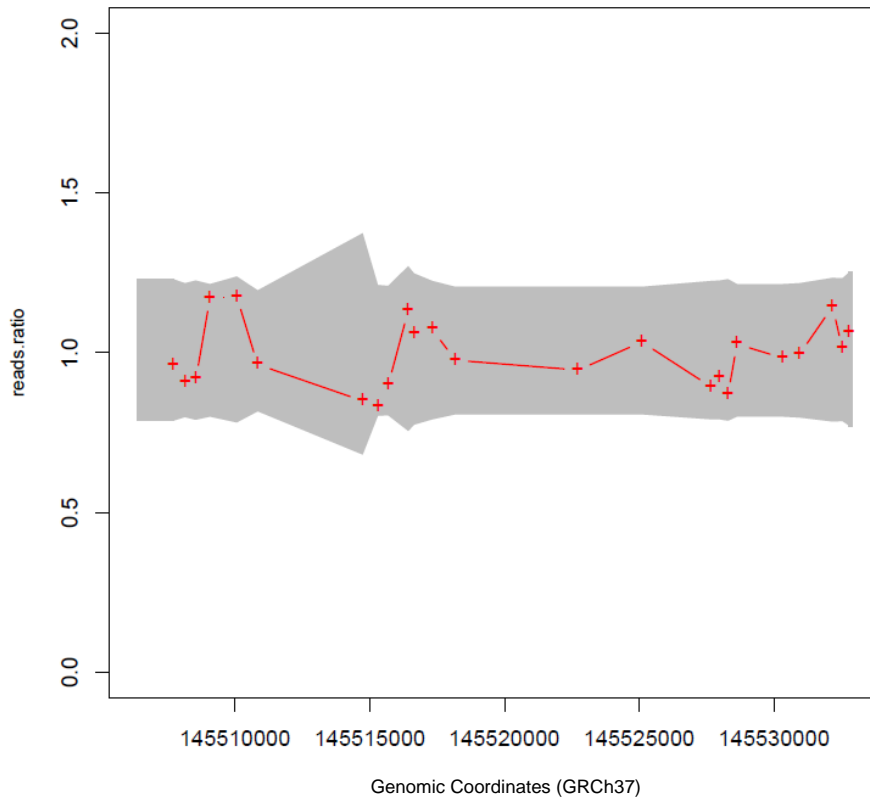

Supplementary Figure S2: ddPCR copy number analysis in 28 probands from Warburg micro/Martsolf syndrome cohort.

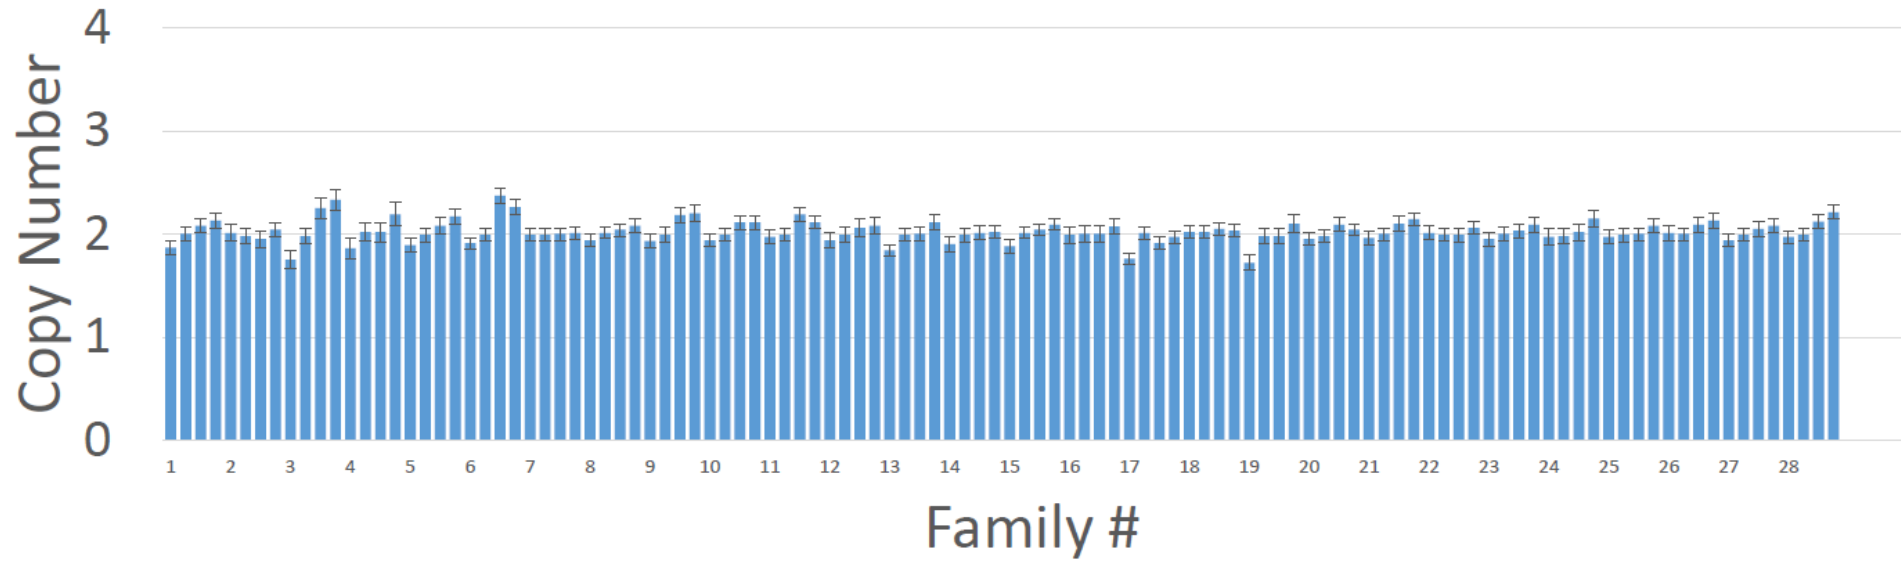

(# = number)

**Supplementary Figure S3: Confirmation of  $\geq 1.87$ Kbp heterozygous deletion encompassing a minimum of exon 1 to exon 3 of *PEX11B* in Patient III.1 and III.2 by dosage PCR of *PEX11B* ex1-Ex4 (yellow bars) and genomic controls (blue bars)**

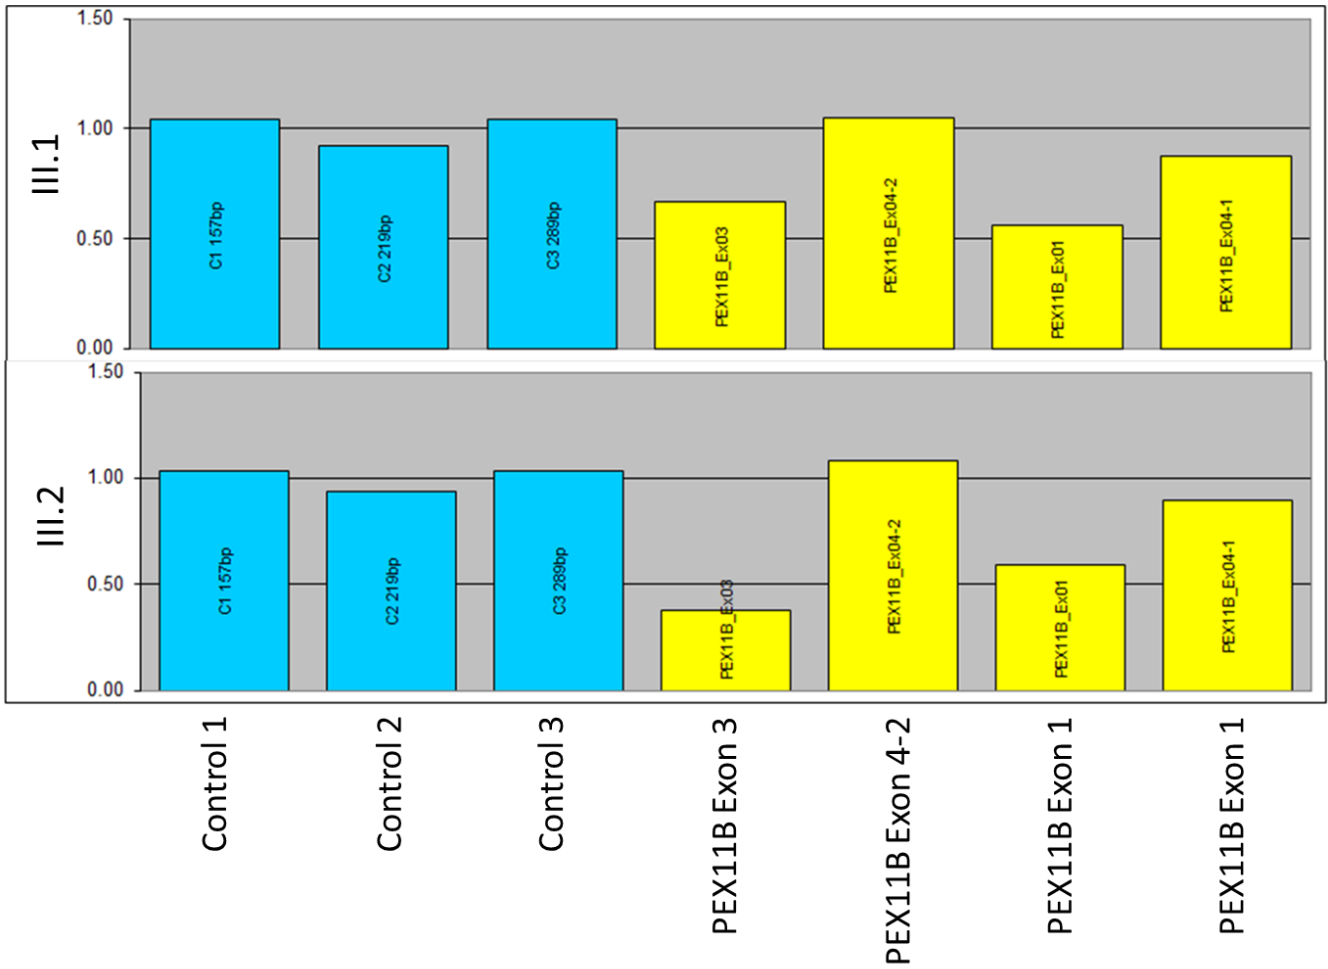

Supplement: NIHMS76336-supplement-Supplementary_Data_SA.pdf [file NIHMS76336-supplement-Supplementary_Data_SA.pdf]
